# Supplementary material for: Transhepatic Insertion of Percutaneous Endoscopic Gastrostomy Tube
Source: Case Rep Gastrointest Med. 2020 Feb 12;2020:4516032. doi: 10.1155/2020/4516032 (PMC7037529; doi:10.1155/2020/4516032)
Supplement: Supplementary Materials — The video legends for the supplementary materials are as follows: Video 1: sagittal computed tomography of the abdomen and pelvis demonstrating transhepatic passage of the percutaneous endoscopic gastrostomy (PEG) tube. Video 2: axial computed tomography of the abdomen and pelvis demonstrating transhepatic passage of the percutaneous endoscopic gastrostomy (PEG tube). [file 4516032.f1.zip]

Archive with 2 entries (2 files):
- Videos/PEG through liver side.mov
- Videos/PEG_through.liver.mov
